# Supplementary material for: Validation of an Effective Protocol for Culicoides Latreille (Diptera: Ceratopogonidae) Detection Using eDNA Metabarcoding
Source: MDPI journal article supplement (doi:10.3390/insects12050401), 2021-04-30
Supplement: s1 [file s1]

| Species                   | Reference for the original description |
|---------------------------|----------------------------------------|
| <i>C. alexanderi</i>      | Wirth and Hubert, 1962                 |
| <i>C. arboricola</i>      | Root and Hoffman, 1937                 |
| <i>C. atchleyi</i>        | Wirth and Blanton, 1969a               |
| <i>C. bickleyi</i>        | Wirth and Hubert, 1962                 |
| <i>C. biguttatus</i>      | Coquillett, 1901                       |
| <i>C. chiopterus</i>      | Meigen, 1930                           |
| <i>C. cockerellii</i>     | Coquillett, 1901                       |
| <i>C. crepuscularis</i>   | Malloch, 1915                          |
| <i>C. denticulatus</i>    | Wirth and Hubert, 1962                 |
| <i>C. downesi</i>         | Wirth and Hubert, 1962                 |
| <i>C. flukei</i>          | Jones, 1956                            |
| <i>C. footei</i>          | Wirth and Jones, 1956                  |
| <i>C. franclemonti</i>    | Cochrane, 1974                         |
| <i>C. frohnei</i>         | Wirth and Blanton, 1969b               |
| <i>C. furensoides</i>     | Williams, 1955                         |
| <i>C. guttipennis</i>     | Coquillett, 1901                       |
| <i>C. haematopotus</i>    | Malloch, 1915                          |
| <i>C. jamnbacki</i>       | Wirth and Hubert, 1962                 |
| <i>C. nanus</i>           | Root and Hoffman, 1937                 |
| <i>C. obsoletus</i>       | Meigen, 1818                           |
| <i>C. paraimpunctatus</i> | Borkent, 1995                          |
| <i>C. parapiliferus</i>   | Wirth and Blanton, 1974                |
| <i>C. piliferus</i>       | Root and Hoffman, 1937                 |
| <i>C. sanguisuga</i>      | Coquillett, 1901                       |
| <i>C. snowi</i>           | Wirth and Jones, 1956                  |
| <i>C. sonorensis</i>      | Wirth and Jones, 1957                  |
| <i>C. sphagnumensis</i>   | Williams, 1955                         |
| <i>C. spinosus</i>        | Root and Hoffman, 1937                 |
| <i>C. stellifer</i>       | Coquillett, 1901                       |
| <i>C. stilobezzioides</i> | Foote and Pratt, 1954                  |
| <i>C. testudinalis</i>    | Wirth and Hubert, 1962                 |
| <i>C. travisi</i>         | Vargas, 1949                           |
| <i>C. utowana</i>         | Jamnback, 1965                         |
| <i>C. variipennis</i>     | Coquillett, 1901                       |
| <i>C. venustus</i>        | Hoffman, 1925                          |
| <i>C. villosipennis</i>   | Root and Hoffman, 1937                 |
| <i>C. wisconsinensis</i>  | Jones, 1956                            |
| <i>C. yukonensis</i>      | Hoffman, 1925                          |
